# Supplementary material for: Highly dispersible and magnetically recyclable poly(1-vinyl imidazole) brush coated magnetic nanoparticles: an effective support for the immobilization of palladium nanoparticles
Source: Royal Society of Chemistry journal article supplement (doi:10.1039/c5nj02576a), 2015-11-20
Supplement: c5nj02576a1.pdf [file c5nj02576a1.pdf]

## Supporting Information

### Highly Dispersible and Magnetically Recyclable Poly(1-Vinyl Imidazole) Brush coated Magnetic Nanoparticle: an Effective Support for Immobilization of Palladium Nanoparticles

Ali Pourjavadi<sup>a\*</sup>, Niloofar Safaie<sup>a</sup>, Seyed Hassan Hosseini<sup>a</sup>, Craig Bennett<sup>b</sup>

<sup>a</sup> Polymer Research Laboratory, Department of Chemistry, Sharif University of Technology, Tehran, Iran

<sup>b</sup> Department of Physics, Acadia University, Wolfville, Nova Scotia, Canada

*E-mail address: purjavad@sharif.edu; Phone/fax: (982)166165311*

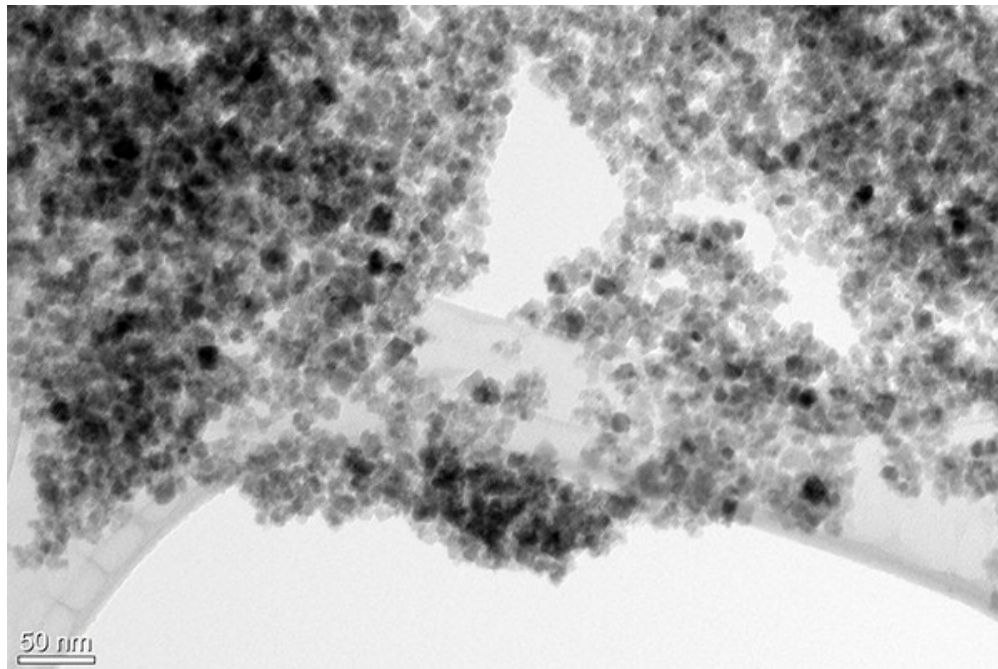

**Fig. S1** TEM image of  $\text{Fe}_3\text{O}_4$ .

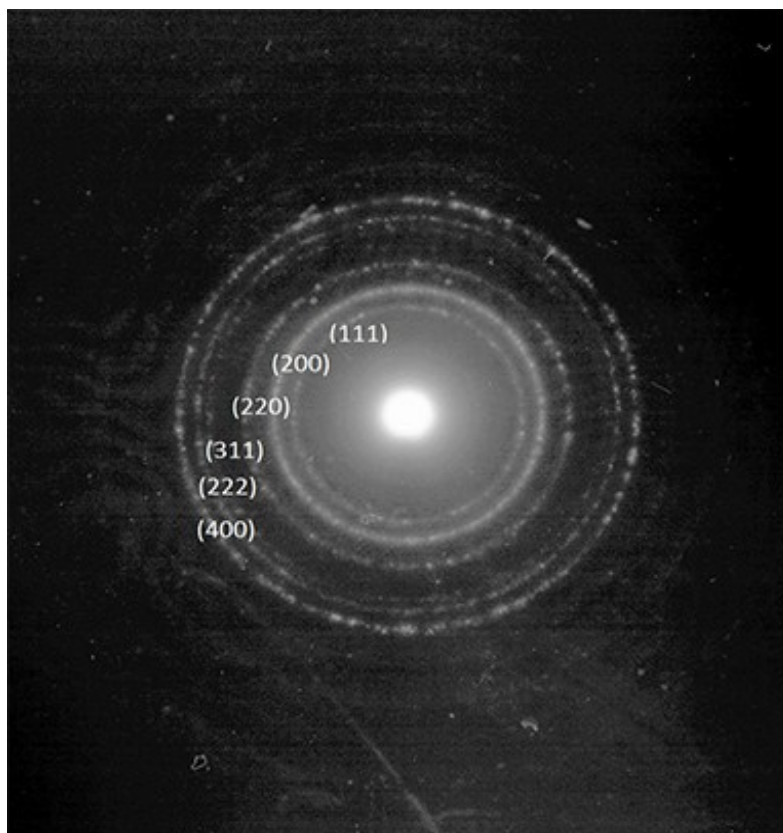

**Fig. S2** Electron diffraction pattern of  $\text{Fe}_3\text{O}_4$ .

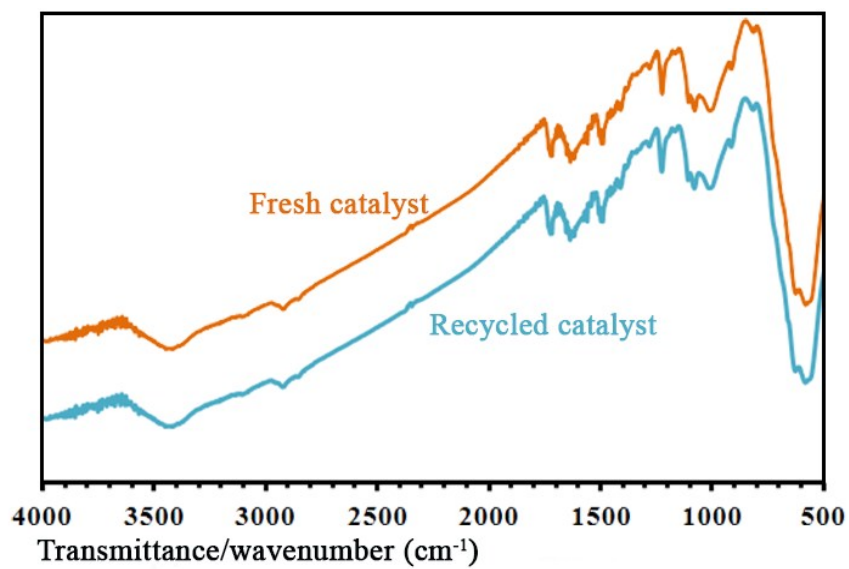

**Fig. S3** FT-IR spectrum of fresh catalyst and recycled catalyst.

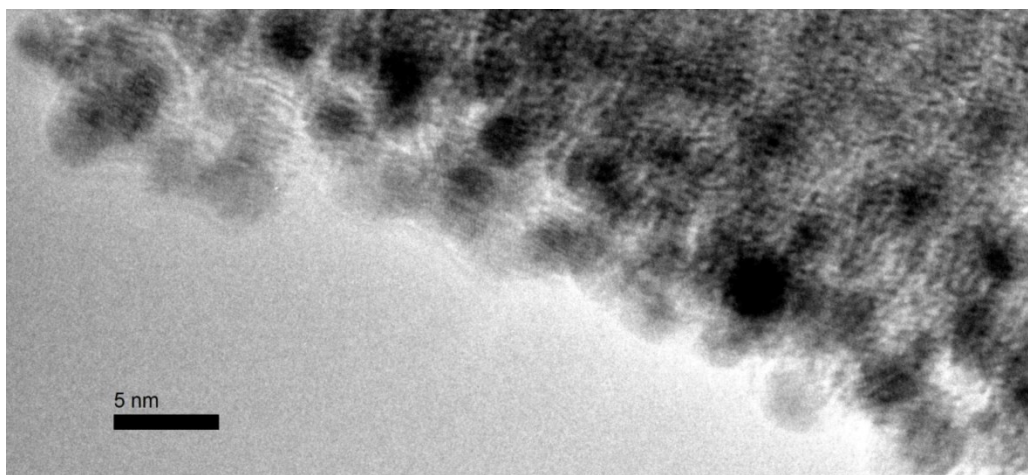

**Fig. S4** The TEM image of recycled catalyst.

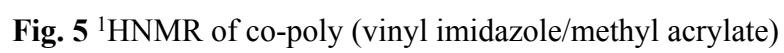

**Fig. 5**  $^1\text{H}$ NMR of co-poly (vinyl imidazole/methyl acrylate)

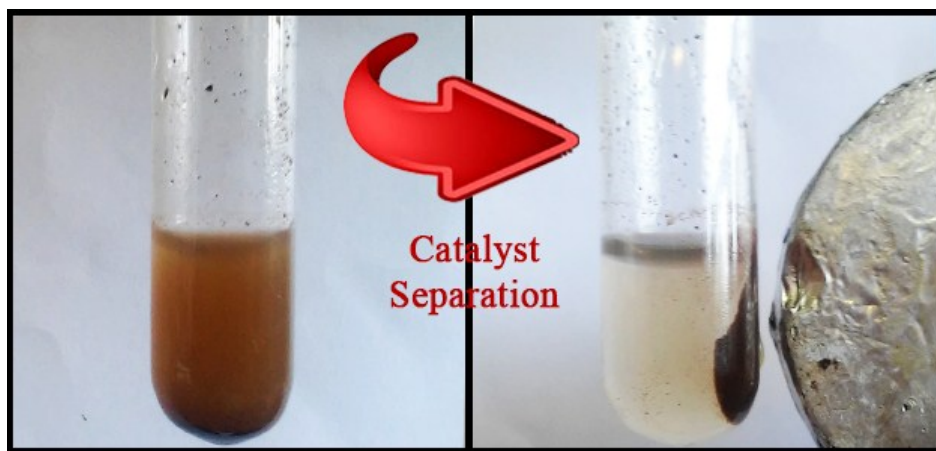

**Fig. 6** Catalyst separation.
